# Supplementary material for: Misinformation, believability, and vaccine acceptance over 40 countries: Takeaways from the initial phase of the COVID-19 infodemic
Source: PLOS journal article supplement (doi:10.1371/journal.pone.0263381), 2022-02-09

# Misinformation, Believability, and Vaccine Acceptance Over 40 Countries: Takeaways From the Initial Phase of The COVID-19 Infodemic

Karandeep Singh<sup>1¶</sup>, Gabriel Lima<sup>2,1¶</sup>, Meeyoung Cha<sup>1,2\*</sup>, Chiyoung Cha<sup>3\*</sup>, Juhi Kulshrestha<sup>4</sup>, Yong-Yeol Ahn<sup>5,6,7</sup>, Onur Varol<sup>8</sup>

**1** Institute for Basic Science, Daejeon, 34126, South Korea

**2** School of Computing, KAIST, Daejeon, 34141, South Korea

**3** College of Nursing, Graduate Program in System Health Science and Engineering, Ewha Womans University, Seoul, 03760, South Korea

**4** Department of Politics and Public Administration, University of Konstanz, 78457 Konstanz, Germany

**5** Center for Complex Networks and Systems Research, Luddy School of Informatics, Computing, and Engineering, Indiana University, IN 47408, USA

**6** Indiana University Network Science Institute, Indiana University, IN 47408, USA

**7** Connection Science, Massachusetts Institute of Technology, MA 02139, USA

**8** Faculty of Engineering and Natural Sciences, Sabanci University, Istanbul 34956, Turkey

¶These authors contributed equally to this work.

\* mcha@ibs.re.kr, chiyoung@ewha.ac.kr

## Supporting Information

# S1 - S14 Tables

**Table S1. Demographic distribution of study participants by country.**

| Country | N    | Gender | Age   |       |       |       |       |       | Education   |              |        |              |
|---------|------|--------|-------|-------|-------|-------|-------|-------|-------------|--------------|--------|--------------|
|         |      | Female | 18-24 | 25-34 | 35-44 | 45-54 | 55-64 | 65+   | HS or Lower | BS or Assoc. | Degree | Grad. Degree |
| AGO     | 355  | 54.9%  | 29%   | 22.8% | 18.9% | 11.5% | 13%   | 4.8%  | 50.7%       |              | 33.8%  | 15.5%        |
| ARG     | 1086 | 25.5%  | 8.1%  | 7.1%  | 21%   | 15.8% | 29.9% | 18%   | 48.2%       |              | 9.9%   | 42%          |
| BFA     | 75   | 77.3%  | 16%   | 21.3% | 22.7% | 12%   | 18.7% | 9.3%  | 24%         |              | 32%    | 44%          |
| BHR     | 31   | 71%    | 9.7%  | 29%   | 22.6% | 12.9% | 12.9% | 12.9% | 16.1%       |              | 71%    | 12.9%        |
| BRA     | 701  | 23.4%  | 29%   | 11.4% | 22.8% | 9.7%  | 16.5% | 10.6% | 54.1%       |              | 30%    | 16%          |
| CAN     | 871  | 36.4%  | 10.8% | 7.9%  | 13.2% | 11.1% | 27.2% | 29.7% | 48.7%       |              | 34.8%  | 16.5%        |
| CHL     | 569  | 19%    | 15.6% | 7.4%  | 26%   | 17%   | 21.1% | 12.8% | 52.4%       |              | 8.8%   | 38.8%        |
| CMR     | 93   | 58.1%  | 10.8% | 23.7% | 30.1% | 11.8% | 20.4% | 3.2%  | 25.8%       |              | 24.7%  | 49.5%        |
| DEU     | 631  | 41%    | 31.7% | 9.4%  | 14.4% | 17.4% | 16.6% | 10.5% | 43.6%       |              | 26.9%  | 29.5%        |
| DOM     | 481  | 24.3%  | 21.6% | 24.5% | 23.5% | 13.5% | 11.2% | 5.6%  | 36.8%       |              | 12.5%  | 50.7%        |
| DZA     | 1061 | 66.6%  | 22.8% | 33.3% | 29.9% | 10.7% | 3%    | 0.3%  | 19.2%       |              | 50.9%  | 29.9%        |
| EGY     | 639  | 60.1%  | 33.6% | 26%   | 23.6% | 10.6% | 4.2%  | 1.9%  | 30.4%       |              | 57%    | 12.7%        |
| ESP     | 363  | 35.8%  | 16.5% | 11.3% | 21.8% | 16.8% | 20.7% | 12.9% | 32%         |              | 24%    | 44.1%        |
| FIN     | 418  | 40%    | 28.9% | 15.6% | 19.1% | 17.7% | 9.3%  | 9.3%  | 45.2%       |              | 30.6%  | 24.2%        |
| FRA     | 728  | 37.5%  | 14.7% | 11.5% | 19.4% | 13.7% | 19.9% | 20.7% | 36.4%       |              | 19.1%  | 44.5%        |
| GBR     | 614  | 30.6%  | 14.5% | 7.5%  | 21.8% | 6.8%  | 16.8% | 32.6% | 47.9%       |              | 31.4%  | 20.7%        |
| GTM     | 681  | 37.9%  | 21.7% | 18.6% | 23.1% | 16.4% | 13.1% | 7%    | 46.1%       |              | 14.7%  | 39.2%        |
| IND     | 229  | 63.3%  | 24%   | 8.3%  | 11.8% | 16.2% | 14.8% | 24.9% | 21%         |              | 29.3%  | 49.8%        |
| IRQ     | 883  | 75.9%  | 22.7% | 32.2% | 22.2% | 16%   | 4.9%  | 2.2%  | 29%         |              | 61.7%  | 9.3%         |
| KEN     | 207  | 51.7%  | 14.5% | 31.4% | 29.5% | 15.5% | 6.8%  | 2.4%  | 42.5%       |              | 38.6%  | 18.8%        |
| MAR     | 454  | 70.7%  | 28%   | 32.6% | 23.3% | 8.1%  | 5.1%  | 2.9%  | 26.9%       |              | 46.9%  | 26.2%        |
| MOZ     | 414  | 57.7%  | 19.1% | 31.2% | 20.5% | 13.5% | 12.3% | 3.4%  | 42.5%       |              | 46.1%  | 11.4%        |
| MYS     | 241  | 41.9%  | 32.8% | 21.2% | 15.8% | 10.8% | 14.1% | 5.4%  | 44.8%       |              | 36.1%  | 19.1%        |
| NER     | 60   | 85%    | 13.3% | 25%   | 20%   | 31.7% | 10%   | 0%    | 23.3%       |              | 25%    | 51.7%        |
| NGA     | 300  | 66.7%  | 16.7% | 30.3% | 27.7% | 14.3% | 9.7%  | 1.3%  | 21%         |              | 52.7%  | 26.3%        |
| NIC     | 528  | 40.2%  | 25.8% | 19.7% | 17.6% | 14.8% | 13.6% | 8.5%  | 34.1%       |              | 8.7%   | 57.2%        |
| PHL     | 621  | 51%    | 24.5% | 12.9% | 19.6% | 11.8% | 17.2% | 14%   | 32%         |              | 49.9%  | 18%          |
| PNG     | 51   | 78.4%  | 9.8%  | 5.9%  | 31.4% | 19.6% | 21.6% | 11.8% | 47.1%       |              | 35.3%  | 17.6%        |
| PRT     | 520  | 28.7%  | 28.7% | 9%    | 26.9% | 12.9% | 12.1% | 10.4% | 49.8%       |              | 37.7%  | 12.5%        |
| RWA     | 106  | 72.6%  | 6.6%  | 21.7% | 30.2% | 25.5% | 12.3% | 3.8%  | 12.3%       |              | 60.4%  | 27.4%        |
| SAU     | 76   | 52.6%  | 6.6%  | 25%   | 30.3% | 19.7% | 14.5% | 3.9%  | 22.4%       |              | 53.9%  | 23.7%        |
| SEN     | 234  | 50.4%  | 10.3% | 18.4% | 17.1% | 14.5% | 23.5% | 16.2% | 28.6%       |              | 19.7%  | 51.7%        |
| SWE     | 779  | 40.9%  | 24.4% | 15.5% | 22.1% | 14.8% | 13.1% | 10.1% | 40.8%       |              | 30.7%  | 28.5%        |
| TTO     | 353  | 32%    | 11.3% | 12.2% | 24.1% | 20.1% | 19.3% | 13%   | 39.9%       |              | 40.8%  | 19.3%        |
| TUN     | 436  | 54.8%  | 29.6% | 27.1% | 25.7% | 12.4% | 3.4%  | 1.8%  | 23.9%       |              | 47.5%  | 28.7%        |
| URY     | 542  | 23.1%  | 11.3% | 6.5%  | 18.8% | 18.6% | 26.6% | 18.3% | 47%         |              | 19.7%  | 33.2%        |
| USA     | 378  | 40.5%  | 14.8% | 8.2%  | 12.7% | 10.8% | 22%   | 31.5% | 37.3%       |              | 38.6%  | 24.1%        |
| VEN     | 459  | 35.1%  | 10%   | 10.5% | 15.3% | 18.7% | 25.3% | 20.3% | 27.5%       |              | 13.9%  | 58.6%        |
| YEM     | 342  | 68.1%  | 27.2% | 32.7% | 25.4% | 11.4% | 2.6%  | 0.6%  | 28.4%       |              | 60.5%  | 11.1%        |
| ZAF     | 704  | 21.6%  | 9.7%  | 8.9%  | 18.9% | 17.5% | 26.3% | 18.8% | 53.7%       |              | 27.1%  | 19.2%        |

**Table S2. Coding rules used for regression analysis of believability and vaccine acceptance.**

| Variable                | Values | Usage        |
|-------------------------|--------|--------------|
| <i>Age</i>              | 0 – 5  | Coded Values |
| <i>Sex</i>              | 0 & 1  | Coded Values |
| <i>Education</i>        | 0 – 4  | Coded Values |
| <i>Financial</i>        | -2 – 2 | Coded Values |
| <i>Vaccine History</i>  | 0 & 1  | Factor       |
| <i>Perceived Threat</i> | 0 – 3  | Mean         |
| <i>Exposure</i>         | 0 & 1  | Count        |
| <i>Fact-Checks</i>      | 0 & 1  | Count        |
| <i>Believability</i>    | -2 – 2 | Mean         |
| <i>Vaccine Decision</i> | 0 & 1  | Factor       |

**Table S3. Model 1 regression results. Average believability is predicted from exposure to false claims and their respective fact-checks. Standard errors are presented between parenthesis. Significance marked as \*  $P < 0.1$ ; \*\*  $P < 0.05$ ; \*\*\*  $P < 0.01$ .**

|                               | <i>Dependent Variable:</i> |
|-------------------------------|----------------------------|
|                               | Average Believability      |
| Constant                      | -1.399***<br>(0.032)       |
| Sex                           | -0.034***<br>(0.011)       |
| Age                           | -0.009**<br>(0.003)        |
| Education                     | -0.027***<br>(0.005)       |
| Financial Status              | -0.111***<br>(0.006)       |
| Health Status                 | 0.071***<br>(0.007)        |
| Perceived Threat              | 0.114***<br>(0.010)        |
| Fact-Checks                   | -0.068***<br>(0.007)       |
| Exposure                      | 0.075***<br>(0.003)        |
| Exposure $\times$ Fact-Checks | 0.010***<br>(0.001)        |
| Observations                  | 18,314                     |
| $R^2$                         | 0.129                      |

**Table S4. Model 1 mixed-regression results. Average believability is predicted from exposure to false claims and their respective fact-checks. We include the respondent's residence country as a random effect. Standard errors are presented between parenthesis. Significance marked as \*  $P < 0.1$ ; \*\*  $P < 0.05$ ; \*\*\*  $P < 0.01$ .**

|                               | <i>Dependent Variable:</i> |
|-------------------------------|----------------------------|
|                               | Average Believability      |
| Constant                      | -0.774***<br>(0.061)       |
| Sex                           | 0.077***<br>(0.011)        |
| Age                           | 0.032***<br>(0.003)        |
| Education                     | -0.058***<br>(0.005)       |
| Financial Status              | -0.091***<br>(0.006)       |
| Health Status                 | 0.018***<br>(0.007)        |
| Perceived Threat              | -0.085***<br>(0.010)       |
| Fact-Checks                   | -0.067***<br>(0.007)       |
| Exposure                      | 0.051***<br>(0.003)        |
| Exposure $\times$ Fact-Checks | 0.010***<br>(0.001)        |
| Country-Level Random Effects  | Yes                        |
| Observations                  | 18,314                     |
| $R^2$                         | 0.247                      |

**Table S5. Model 1 elastic regression results. Average believability is predicted from exposure to false claims and their respective fact-checks.**

|                               | <i>Dependent Variable:</i> |
|-------------------------------|----------------------------|
|                               | Average Believability      |
| Constant                      | -1.096                     |
| Sex - Male                    | 0.039                      |
| Sex - Female                  | -0.002                     |
| Age                           | -0.006                     |
| Education                     | -0.014                     |
| Financial Status              | -0.058                     |
| Health Status                 | 0.043                      |
| Perceived Threat              | 0.103                      |
| Fact-Checks                   | -0.042                     |
| Exposure                      | 0.049                      |
| Exposure $\times$ Fact-Checks | 0.007                      |
| Observations                  | 18,314                     |

**Table S6. Model 1 lasso regression results. Average believability is predicted from exposure to false claims and their respective fact-checks.**

|                               | <i>Dependent Variable:</i> |
|-------------------------------|----------------------------|
|                               | Average Believability      |
| Constant                      | −1.100                     |
| Sex - Male                    | 0.040                      |
| Sex - Female                  | 0.000                      |
| Age                           | −0.006                     |
| Education                     | −0.013                     |
| Financial Status              | −0.058                     |
| Health Status                 | 0.042                      |
| Perceived Threat              | 0.102                      |
| Fact-Checks                   | −0.039                     |
| Exposure                      | 0.050                      |
| Exposure $\times$ Fact-Checks | 0.006                      |
| Observations                  | 18,314                     |

**Table S7. Model 2 regression results. Each respondents' vaccine decision is predicted based on exposure to false claims and their fact-checks, believability, perceived threat, and vaccination history. Standard errors are presented between parenthesis. Significance marked as \*  $P < 0.1$ ; \*\*  $P < 0.05$ ; \*\*\*  $P < 0.01$ .**

|                                                          | <i>Dependent Variable:</i> |
|----------------------------------------------------------|----------------------------|
|                                                          | Vaccine Acceptance         |
| Constant                                                 | -2.067***<br>(0.101)       |
| Sex                                                      | -0.307***<br>(0.033)       |
| Age                                                      | -0.051***<br>(0.010)       |
| Education                                                | 0.019<br>(0.014)           |
| Financial Status                                         | 0.145***<br>(0.018)        |
| Health Status                                            | -0.007<br>(0.020)          |
| Past Vaccination                                         | -0.195***<br>(0.046)       |
| Past Non-Mandatory Vaccination                           | 0.737***<br>(0.073)        |
| Past Vaccination $\times$ Past Non-Mandatory Vaccination | 0.129<br>(0.082)           |
| Perceived Threat                                         | 0.775***<br>(0.029)        |
| Fact-Checks                                              | 0.061***<br>(0.021)        |
| Exposure                                                 | -0.023**<br>(0.009)        |
| Average Believability                                    | -0.598***<br>(0.023)       |
| Exposure $\times$ Fact-Checks                            | 0.002<br>(0.003)           |
| Observations                                             | 18,314                     |
| $R^2$                                                    | 0.132                      |

**Table S8. Model 2 mixed-regression results. Each respondents' vaccine decision is predicted based on exposure to false claims and their fact-checks, believability, perceived threat, and vaccination history. We include the respondent's residence country as a random effect. Standard errors are presented between parenthesis. Significance marked as \*  $P < 0.1$ ; \*\*  $P < 0.05$ ; \*\*\*  $P < 0.01$ .**

|                                                          | <i>Dependent Variable:</i> |
|----------------------------------------------------------|----------------------------|
|                                                          | Vaccine Acceptance         |
| Constant                                                 | -1.859***<br>(0.134)       |
| Sex                                                      | -0.298***<br>(0.035)       |
| Age                                                      | -0.025**<br>(0.011)        |
| Education                                                | 0.008<br>(0.015)           |
| Financial Status                                         | 0.151***<br>(0.019)        |
| Health Status                                            | -0.064***<br>(0.021)       |
| Past Vaccination                                         | -0.155***<br>(0.052)       |
| Past Non-Mandatory Vaccination                           | 0.611***<br>(0.076)        |
| Past Vaccination $\times$ Past Non-Mandatory Vaccination | 0.273***<br>(0.085)        |
| Perceived Threat                                         | 0.643***<br>(0.032)        |
| Fact-Checks                                              | 0.050**<br>(0.022)         |
| Exposure                                                 | -0.028***<br>(0.009)       |
| Average Believability                                    | -0.689***<br>(0.025)       |
| Exposure $\times$ Fact-Checks                            | 0.003<br>(0.003)           |
| Country-Level Random Effects                             | Yes                        |
| Observations                                             | 18,314                     |
| $R^2$                                                    | 0.169                      |

**Table S9. Model 2 elastic regression results. Each respondents' vaccine decision is predicted based on exposure to false claims and their fact-checks, believability, perceived threat, and vaccination history.**

|                                                   | <i>Dependent Variable:</i> |
|---------------------------------------------------|----------------------------|
|                                                   | Vaccine Acceptance         |
| Constant                                          | −2.067                     |
| Sex - Male                                        | 0.148                      |
| Sex - Female                                      | −0.133                     |
| Age                                               | −0.043                     |
| Education                                         | 0.015                      |
| Financial Status                                  | 0.127                      |
| Health Status                                     | −0.001                     |
| Past Vaccination                                  | −0.173                     |
| Past Non-Mandatory Vaccination                    | 0.650                      |
| Past Vaccination × Past Non-Mandatory Vaccination | 0.181                      |
| Perceived Threat                                  | 0.712                      |
| Fact-Checks                                       | 0.056                      |
| Exposure                                          | −0.018                     |
| Average Believability                             | −0.555                     |
| Exposure × Fact-Checks                            | 0.002                      |
| Observations                                      | 18,314                     |

**Table S10. Model 2 lasso regression results. Each respondents' vaccine decision is predicted based on exposure to false claims and their fact-checks, believability, perceived threat, and vaccination history.**

|                                                   | <i>Dependent Variable:</i> |
|---------------------------------------------------|----------------------------|
|                                                   | Vaccine Acceptance         |
| Constant                                          | −2.370                     |
| Sex - Male                                        | 0.296                      |
| Sex - Female                                      | 0.000                      |
| Age                                               | −0.047                     |
| Education                                         | 0.015                      |
| Financial Status                                  | 0.137                      |
| Health Status                                     | 0.000                      |
| Past Vaccination                                  | −0.174                     |
| Past Non-Mandatory Vaccination                    | 0.745                      |
| Past Vaccination × Past Non-Mandatory Vaccination | 0.103                      |
| Perceived Threat                                  | 0.761                      |
| Fact-Checks                                       | 0.068                      |
| Exposure                                          | −0.017                     |
| Average Believability                             | −0.591                     |
| Exposure × Fact-Checks                            | 0.001                      |
| Observations                                      | 18,314                     |



**Table S11. Model 3 regression results. Each respondents' vaccine decision is predicted based on exposure to false claims and their fact-checks, believability, perceived threat, and vaccination history. Claims are grouped into their respective topic. Standard errors are presented between parenthesis. Significance marked as \*  $P < 0.1$ ; \*\*  $P < 0.05$ ; \*\*\*  $P < 0.01$ .**

|                                                            | <i>Dependent Variable:</i> |
|------------------------------------------------------------|----------------------------|
|                                                            | Vaccine Acceptance         |
| Constant                                                   | -1.997***<br>(0.104)       |
| Sex                                                        | -0.304***<br>(0.035)       |
| Age                                                        | -0.054***<br>(0.010)       |
| Education                                                  | 0.006<br>(0.015)           |
| Financial Status                                           | 0.105***<br>(0.019)        |
| Health Status                                              | -0.007<br>(0.020)          |
| Past Vaccination                                           | -0.040<br>(0.048)          |
| Past Non-Mandatory Vaccination                             | 0.730***<br>(0.075)        |
| Past Vaccination $\times$ Past Non-Mandatory Vaccination   | 0.117<br>(0.084)           |
| Perceived Threat                                           | 0.724***<br>(0.030)        |
| Exposure to Vaccination-Related Claims                     | -0.164***<br>(0.019)       |
| Fact-Checks of Vaccination-Related Claims                  | 0.182**<br>(0.073)         |
| Average Believability of Vaccination-Related Claims        | -0.594***<br>(0.021)       |
| Exposure $\times$ Fact-Checks - Vaccination-Related Claims | -0.016<br>(0.028)          |
| Exposure to DIY Claims                                     | 0.105***<br>(0.021)        |
| Fact-Checks of DIY Claims                                  | -0.004<br>(0.045)          |
| Average Believability of DIY Claims                        | 0.005<br>(0.027)           |
| Exposure $\times$ Fact-Checks - DIY Claims                 | 0.014<br>(0.015)           |
| Exposure to Hot&Co Claims                                  | 0.054**<br>(0.025)         |
| Fact-Checks of Hot&Co Claims                               | 0.058<br>(0.050)           |
| Average Believability of Hot&Co Claims                     | 0.060**<br>(0.024)         |
| Exposure $\times$ Fact-Checks - Hot&Co Claims              | -0.007<br>(0.023)          |
| Exposure to 5G Claim                                       | -0.131***<br>(0.040)       |
| Fact-Check of 5G Claim                                     | 0.014<br>(0.148)           |
| Average Believability of 5G Claim                          | -0.010<br>(0.017)          |
| Exposure $\times$ Fact-Checks - 5G Claim                   | 0.038<br>(0.154)           |
| Observations                                               | 18,314                     |
| $R^2$                                                      | 0.178                      |

**Table S12. Model 3 mixed-regression results. Each respondents' vaccine decision is predicted based on exposure to false claims and their fact-checks, believability, perceived threat, and vaccination history. Claims are grouped into their respective topic. We include the respondent's residence country as a random effect. Standard errors are presented between parenthesis. Significance marked as \*  $P < 0.1$ ; \*\*  $P < 0.05$ ; \*\*\*  $P < 0.01$ .**

|                                                            | <i>Dependent Variable:</i> |
|------------------------------------------------------------|----------------------------|
|                                                            | Vaccine Acceptance         |
| Constant                                                   | -1.777***<br>(0.134)       |
| Sex                                                        | -0.320***<br>(0.037)       |
| Age                                                        | -0.042***<br>(0.011)       |
| Education                                                  | 0.001<br>(0.016)           |
| Financial Status                                           | 0.118***<br>(0.020)        |
| Health Status                                              | -0.062***<br>(0.021)       |
| Past Vaccination                                           | -0.110**<br>(0.053)        |
| Past Non-Mandatory Vaccination                             | 0.625***<br>(0.078)        |
| Past Vaccination $\times$ Past Non-Mandatory Vaccination   | 0.213**<br>(0.087)         |
| Perceived Threat                                           | 0.626***<br>(0.033)        |
| Exposure to Vaccination-Related Claims                     | -0.164***<br>(0.020)       |
| Fact-Checks of Vaccination-Related Claims                  | 0.175**<br>(0.074)         |
| Average Believability of                                   | -0.616***<br>(0.021)       |
| Exposure $\times$ Fact-Checks - Vaccination-Related Claims | -0.011<br>(0.028)          |
| Exposure to DIY Claims                                     | 0.065***<br>(0.022)        |
| Fact-Checks of DIY Claims                                  | 0.015<br>(0.046)           |
| Average Believability of DIY Claims                        | -0.025<br>(0.028)          |
| Exposure $\times$ Fact-Checks - DIY Claims                 | 0.012<br>(0.015)           |
| Exposure to Hot&Co Claims                                  | 0.084***<br>(0.026)        |
| Fact-Checks of Hot&Co Claims                               | 0.027<br>(0.051)           |
| Average Believability of Hot&Co Claims                     | 0.070***<br>(0.024)        |
| Exposure $\times$ Fact-Checks - Hot&Co Claims              | -0.005<br>(0.023)          |
| Exposure to 5G Claim                                       | -0.090**<br>(0.042)        |
| Fact-Checks of 5G Claim                                    | 0.036<br>(0.152)           |
| Average Believability of 5G Claim                          | -0.043**<br>(0.018)        |
| Exposure $\times$ Fact-Checks - 5G Claim                   | 0.061<br>(0.157)           |
| Country-Level Random Effects                               | Yes                        |
| Observations                                               | 18,314                     |
| $R^2$                                                      | 0.208                      |

**Table S13. Model 3 elastic regression results. Each respondents' vaccine decision is predicted based on exposure to false claims and their fact-checks, believability, perceived threat, and vaccination history. Claims are grouped into their respective topic.**

|                                                     | <i>Dependent Variable:</i> |
|-----------------------------------------------------|----------------------------|
|                                                     | Vaccine Acceptance         |
| Constant                                            | −2.210                     |
| Sex - Male                                          | 0.248                      |
| Sex - Female                                        | −0.045                     |
| Age                                                 | −0.050                     |
| Education                                           | 0.002                      |
| Financial Status                                    | 0.097                      |
| Health Status                                       | —                          |
| Past Vaccination                                    | −0.025                     |
| Past Non-Mandatory Vaccination                      | 0.730                      |
| Past Vaccination × Past Non-Mandatory Vaccination   | 0.094                      |
| Perceived Threat                                    | 0.709                      |
| Exposure to Vaccination-Related Claims              | −0.161                     |
| Fact-Checks of Vaccination-Related Claims           | 0.133                      |
| Average Believability of                            | −0.582                     |
| Exposure × Fact-Checks - Vaccination-Related Claims | —                          |
| Exposure to DIY Claims                              | 0.103                      |
| Fact-Checks of DIY Claims                           | 0.002                      |
| Average Believability of DIY Claims                 | —                          |
| Exposure × Fact-Checks - DIY Claims                 | 0.012                      |
| Exposure to Hot&Co Claims                           | 0.046                      |
| Fact-Checks of Hot&Co Claims                        | 0.043                      |
| Average Believability of Hot&Co Claims              | 0.052                      |
| Exposure × Fact-Checks - Hot&Co Claims              | —                          |
| Exposure to 5G Claim                                | −0.116                     |
| Fact-Checks of 5G Claim                             | 0.012                      |
| Average Believability of 5G Claim                   | −0.008                     |
| Exposure × Fact-Checks - 5G Claim                   | 0.024                      |
| Observations                                        | 18,314                     |

**Table S14. Model 3 lasso regression results. Each respondents' vaccine decision is predicted based on exposure to false claims and their fact-checks, believability, perceived threat, and vaccination history. Claims are grouped into their respective topic.**

|                                                            | <i>Dependent Variable:</i> |
|------------------------------------------------------------|----------------------------|
|                                                            | Vaccine Acceptance         |
| Constant                                                   | -2.267                     |
| Sex - Male                                                 | 0.294                      |
| Sex - Female                                               | 0.000                      |
| Age                                                        | -0.051                     |
| Education                                                  | 0.002                      |
| Financial Status                                           | 0.098                      |
| Health Status                                              | —                          |
| Past Vaccination                                           | -0.024                     |
| Past Non-Mandatory Vaccination                             | 0.739                      |
| Past Vaccination $\times$ Past Non-Mandatory Vaccination   | 0.087                      |
| Perceived Threat                                           | 0.713                      |
| Exposure to Vaccination-Related Claims                     | -0.162                     |
| Fact-Checks of Vaccination-Related Claims                  | 0.134                      |
| Average Believability of                                   | -0.586                     |
| Exposure $\times$ Fact-Checks - Vaccination-Related Claims | —                          |
| Exposure to DIY Claims                                     | 0.103                      |
| Fact-Checks of DIY Claims                                  | 0.000                      |
| Average Believability of DIY Claims                        | —                          |
| Exposure $\times$ Fact-Checks - DIY Claims                 | 0.013                      |
| Exposure to Hot&Co Claims                                  | 0.046                      |
| Fact-Checks of Hot&Co Claims                               | 0.043                      |
| Average Believability of Hot&Co Claims                     | 0.054                      |
| Exposure $\times$ Fact-Checks - Hot&Co Claims              | —                          |
| Exposure to 5G Claim                                       | -0.117                     |
| Fact-Checks of 5G Claim                                    | 0.030                      |
| Average Believability of 5G Claim                          | -0.007                     |
| Exposure $\times$ Fact-Checks - 5G Claim                   | 0.007                      |
| Observations                                               | 18,314                     |

**Fig S1. Country-level exposure to misinformation (pink) and fact-checks (purple)**

The plot indicates the percentage of participants who have seen each claim and its corresponding fact-check in a specific country covered by our study. The numbers are calculated after post-stratification weighting by the process of raking. The radial axis represents the percentages ranging from 0 to 100. In the angular axis, distinct claims representing similar notions, i.e., vaccination-related claims, are arranged together. The titles of the plots are each country's ISO 3166-1 alpha-3 codes.

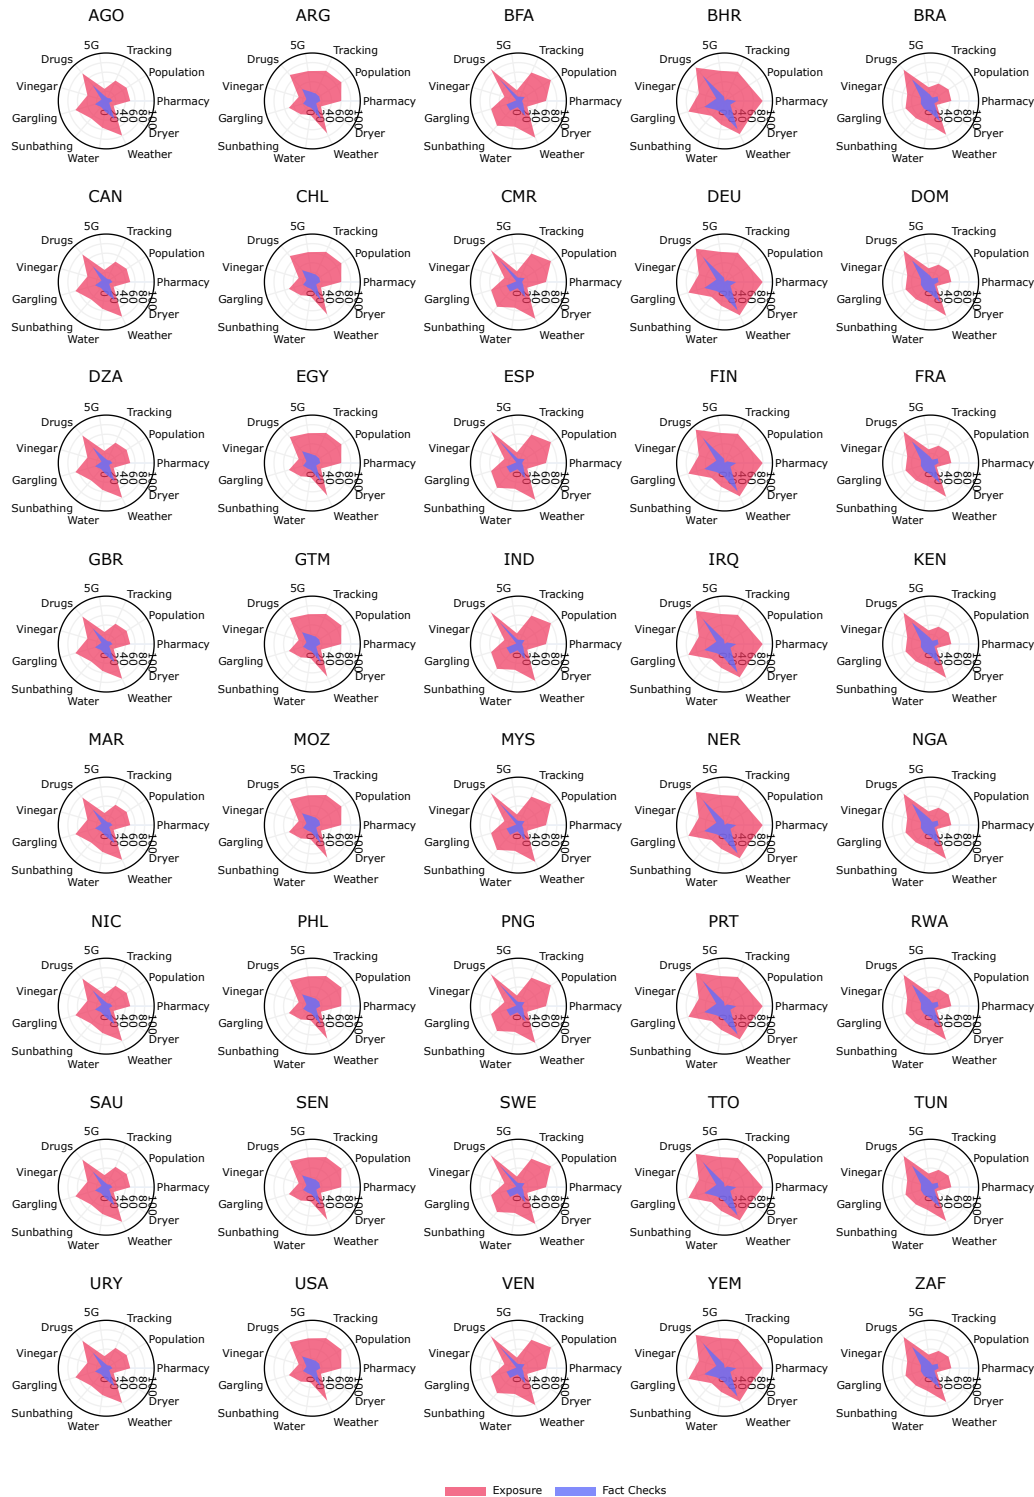

Supplement: S1 (10.1371/journal.pone.0263381.s001) [file journal.pone.0263381.s001]
